# Supplementary material for: REVERBa couples the circadian clock to hepatic glucocorticoid action
Source: PubMed Central journal article supplement (PMC6160001; doi:10.1172/jci96138), 2018-09-04
Supplement: jci-128-96138-s155.pdf [file jci-128-96138-s155.pdf]

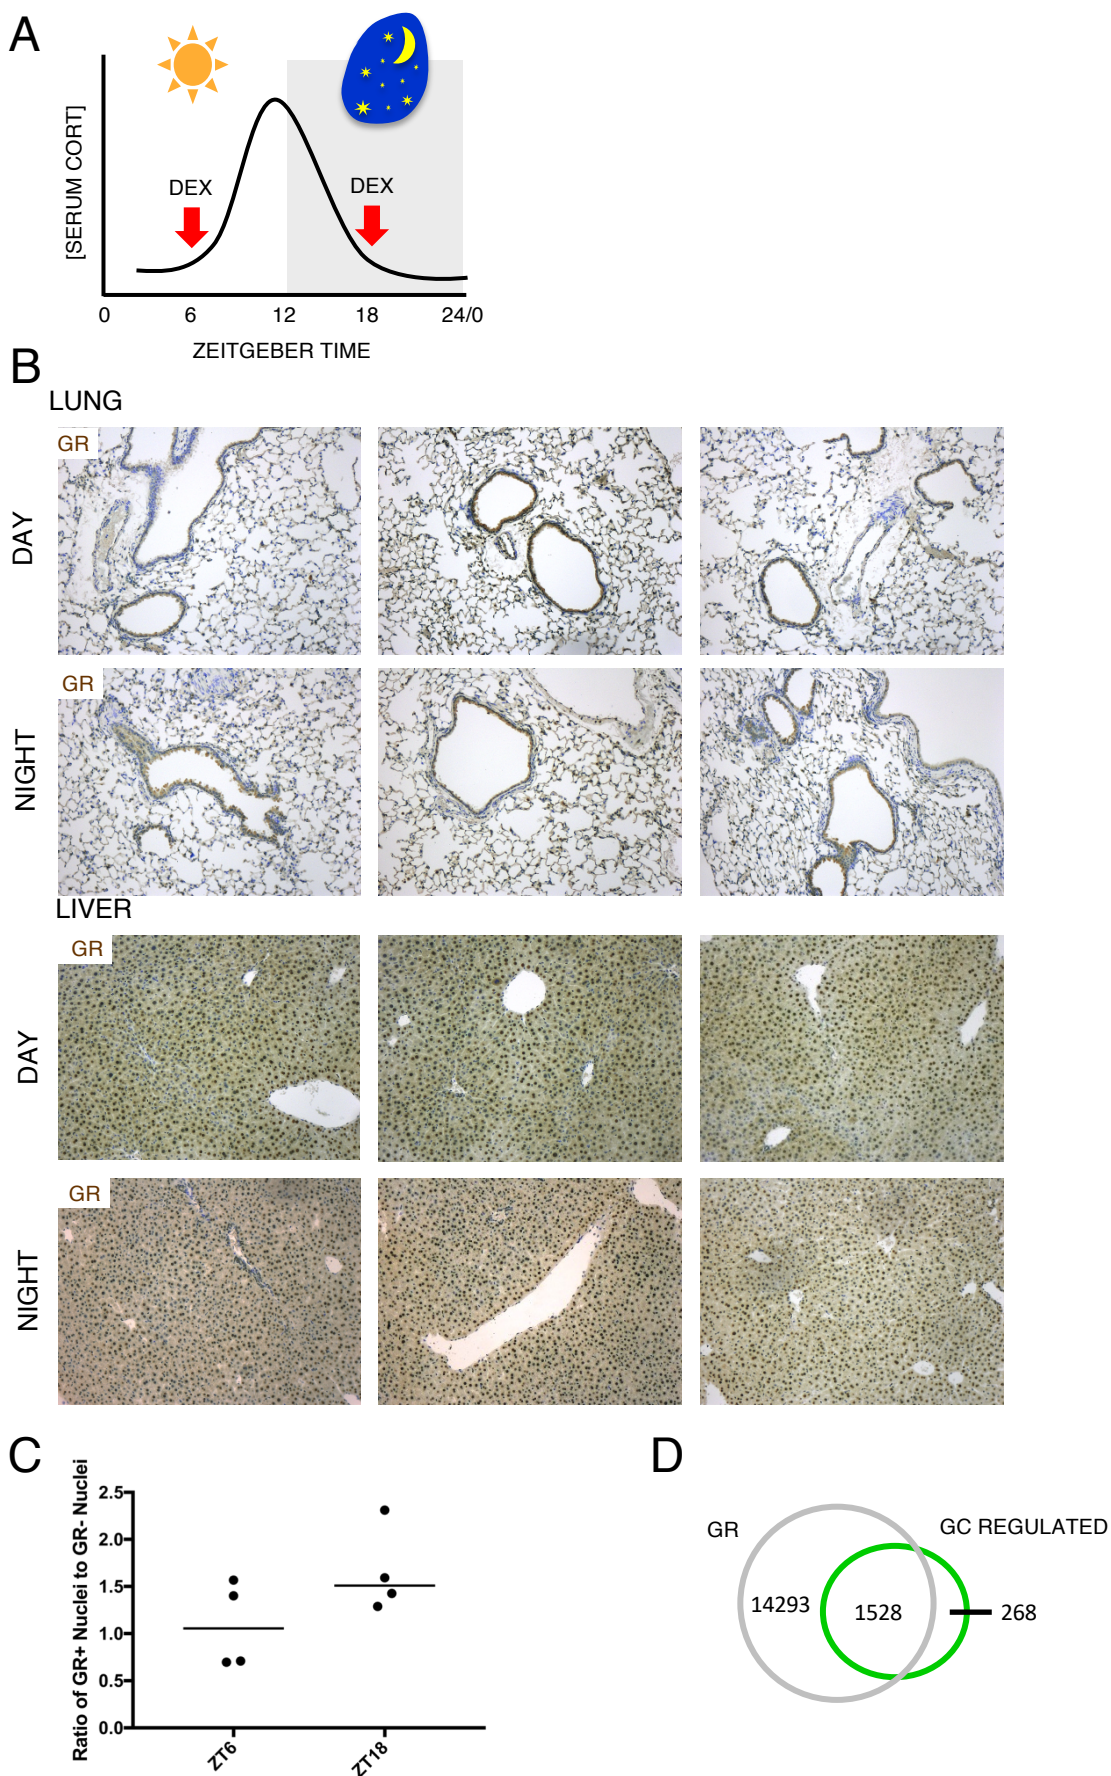

**Figure S1. GR expression does not alter throughout the day in lung or liver.** C57BL/6 mice were given vehicle or 1mg/kg I.P. dexamethasone at ZT6 (1pm, day) or ZT18 (1am, night), culled 2 hours later and lung and liver analysed by RNA-seq (A) Lung and liver were analysed by immunohistochemistry for GR expression (brown) and nuclei counterstained with toluidine blue. Three examples are shown. 10x magnification (B). GR nuclear localisation in liver was quantified using ImageJ, 1 field from 4 mice were analysed (C). GC regulated genes in the liver were compared to ChIP-seq annotated genes bound by GR in mouse liver (D). Statistical analysis by Mann-Whitney test.

**A**

DAY

NIGHT

CARBOHYDRATE METABOLISM

CARBOHYDRATE METABOLISM

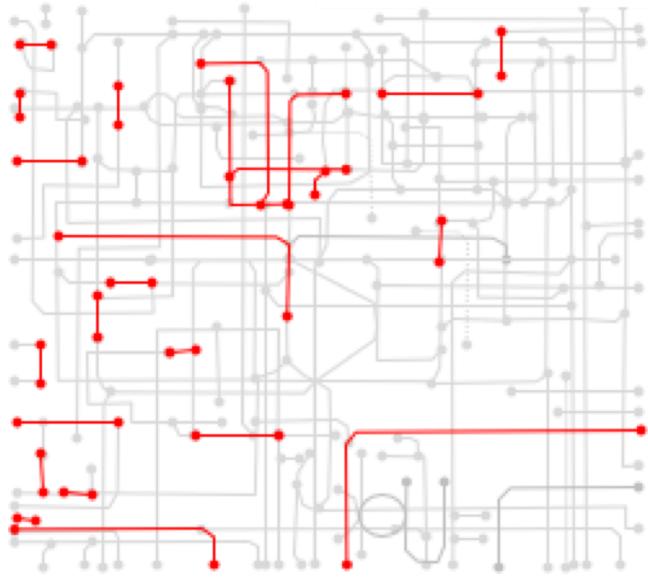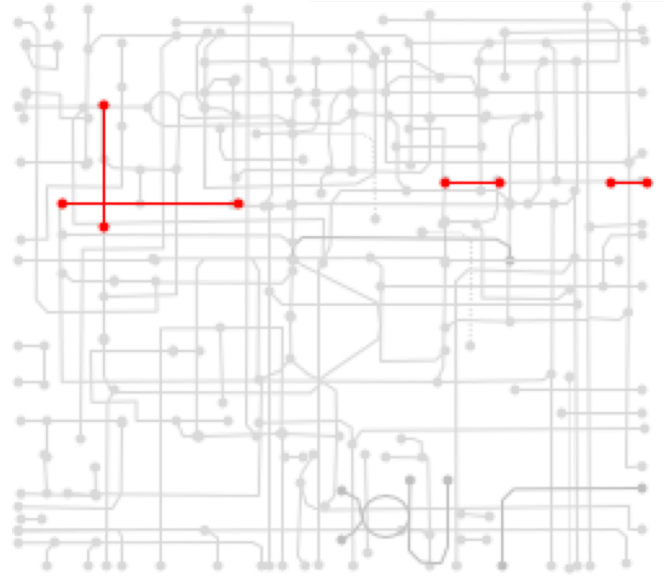

LIPID METABOLISM

LIPID METABOLISM

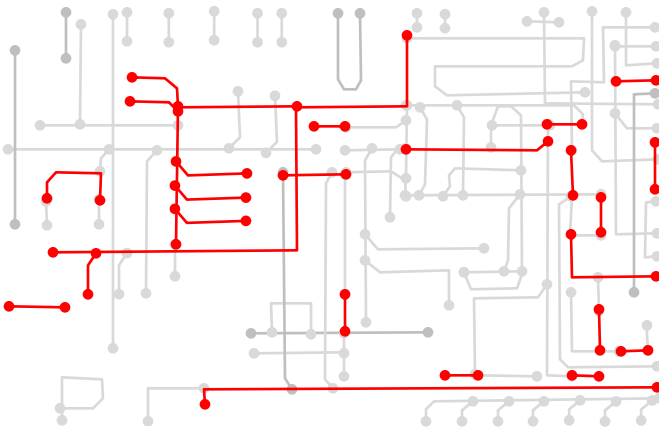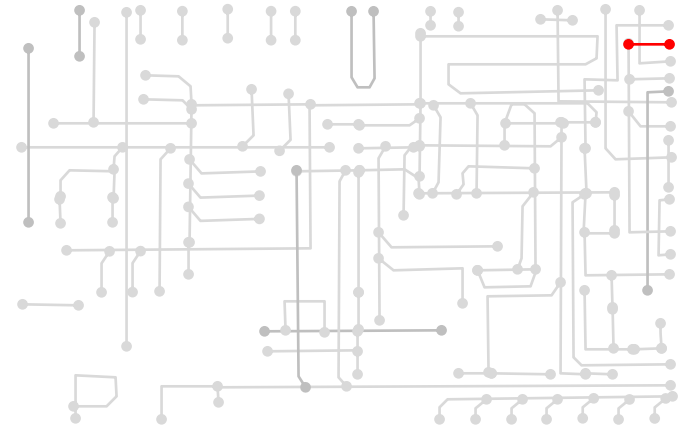 DEX REGULATED PATHWAY

**Figure S2. Day specific GC regulated genes in liver control key metabolic pathways.** Schematic summarizing KEGG Pathway analysis of GC regulated genes in liver. GC regulated pathways are shown in red.

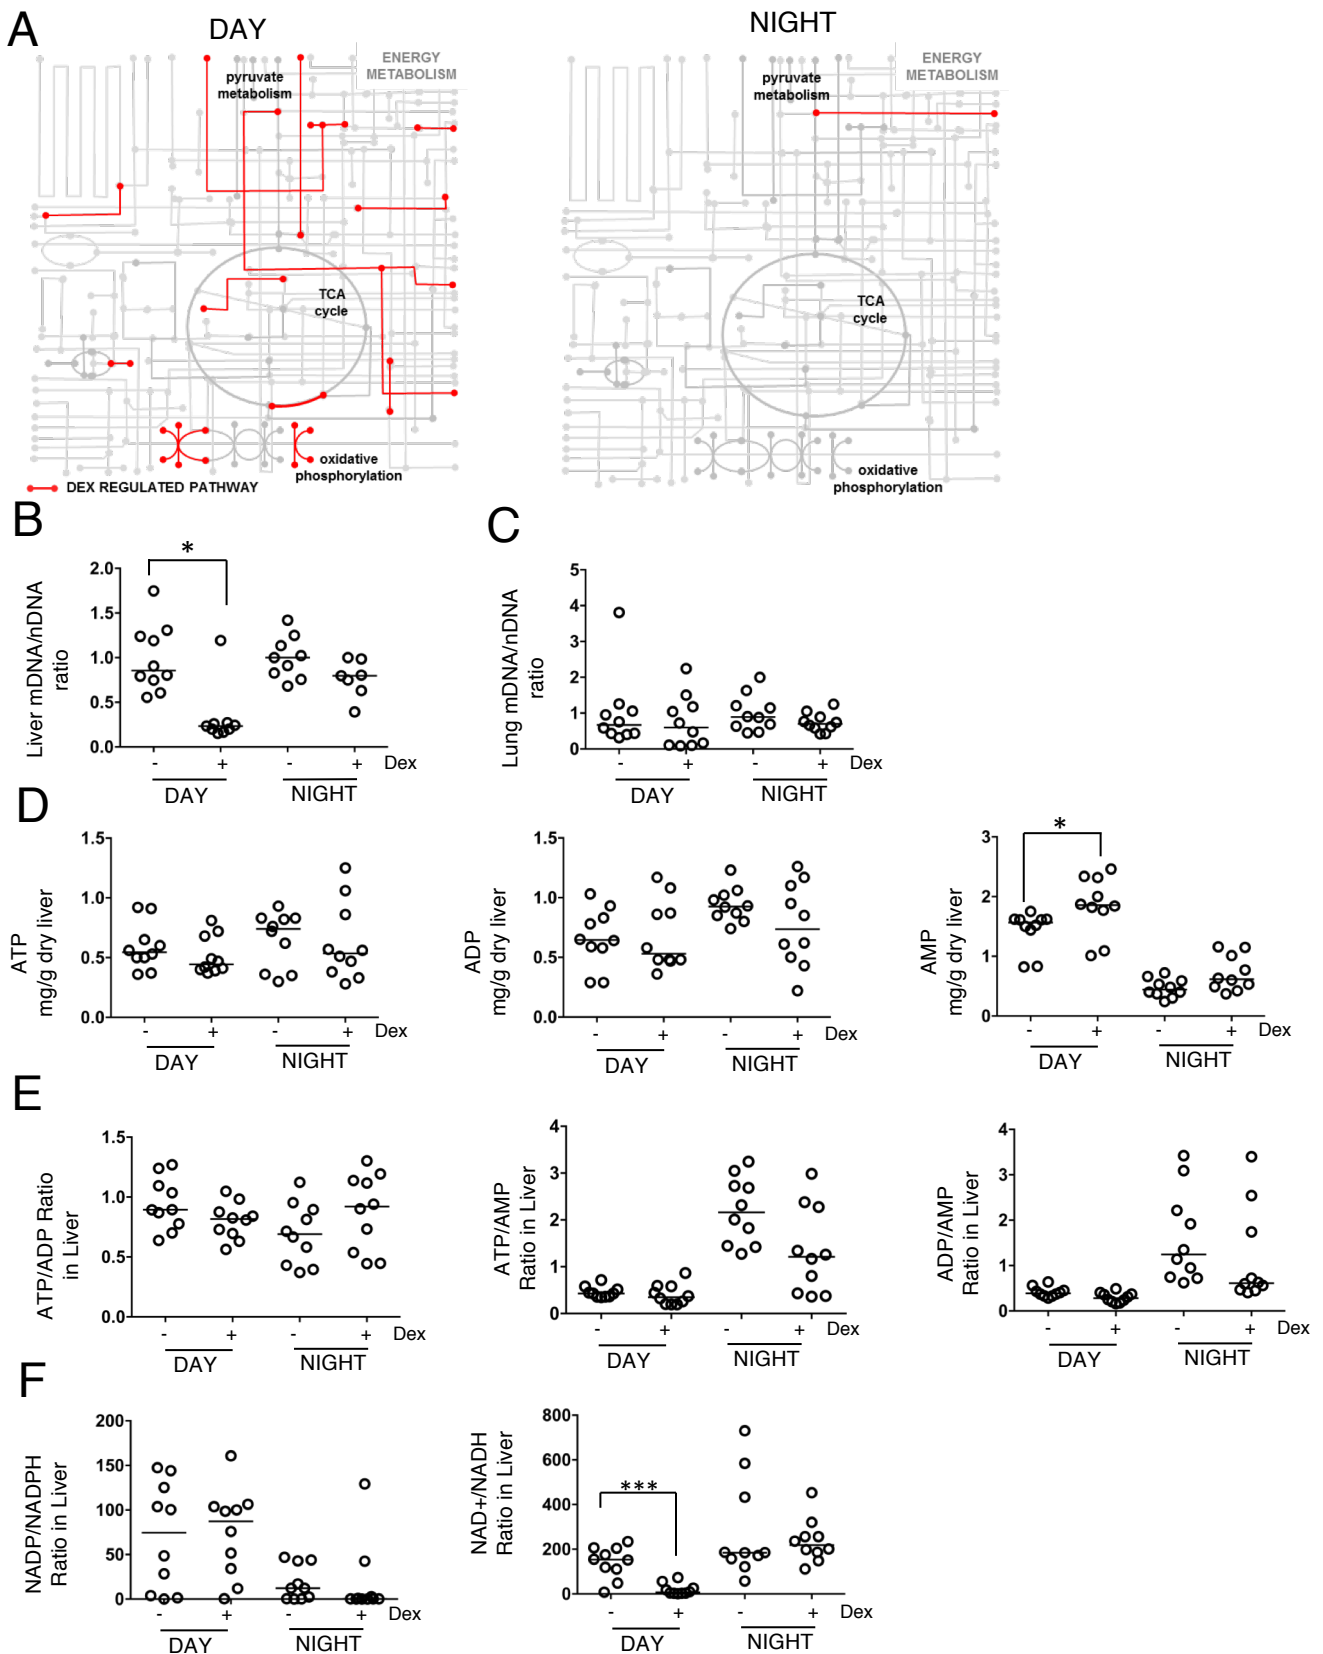

**Figure S3. GC reduces mitochondrial number in the liver only in the day.** Schematic summarizing KEGG Pathway analysis of GC regulated genes in liver related to mitochondrial metabolism. GC regulated pathways are shown in red (**A**) C57BL/6 mice were treated with 1mg/kg I.P. dexamethasone at either ZT6 or ZT18 and culled 4 hours later. Relative mitochondrial DNA in liver (N=7-10) (**B**) and lung (N=10) (**C**), were normalised to vehicle. AMP, ADP, ATP (**D**) and NADP, NADPH, NAD<sup>+</sup> and NADH (**E**) were measured via HPLC in dry mouse liver (N=10). Ratios of NADP to NADPH and NAD<sup>+</sup> to NADH (**F**) were calculated. Data shown as median. Statistical analysis of GC treatment via one-way ANOVA with a Holm-Sidak multiple comparisons correction (mitochondrial quantification AMP, ADP and ATP) or one-way ANOVA, followed by a t-test NADP, NADPH, NAD<sup>+</sup> NADP/NADPH ratio and NAD<sup>+</sup>/NADH ratio), p < 0.05 \* p < 0.001 \*\*, p < 0.0001 \*\*\*

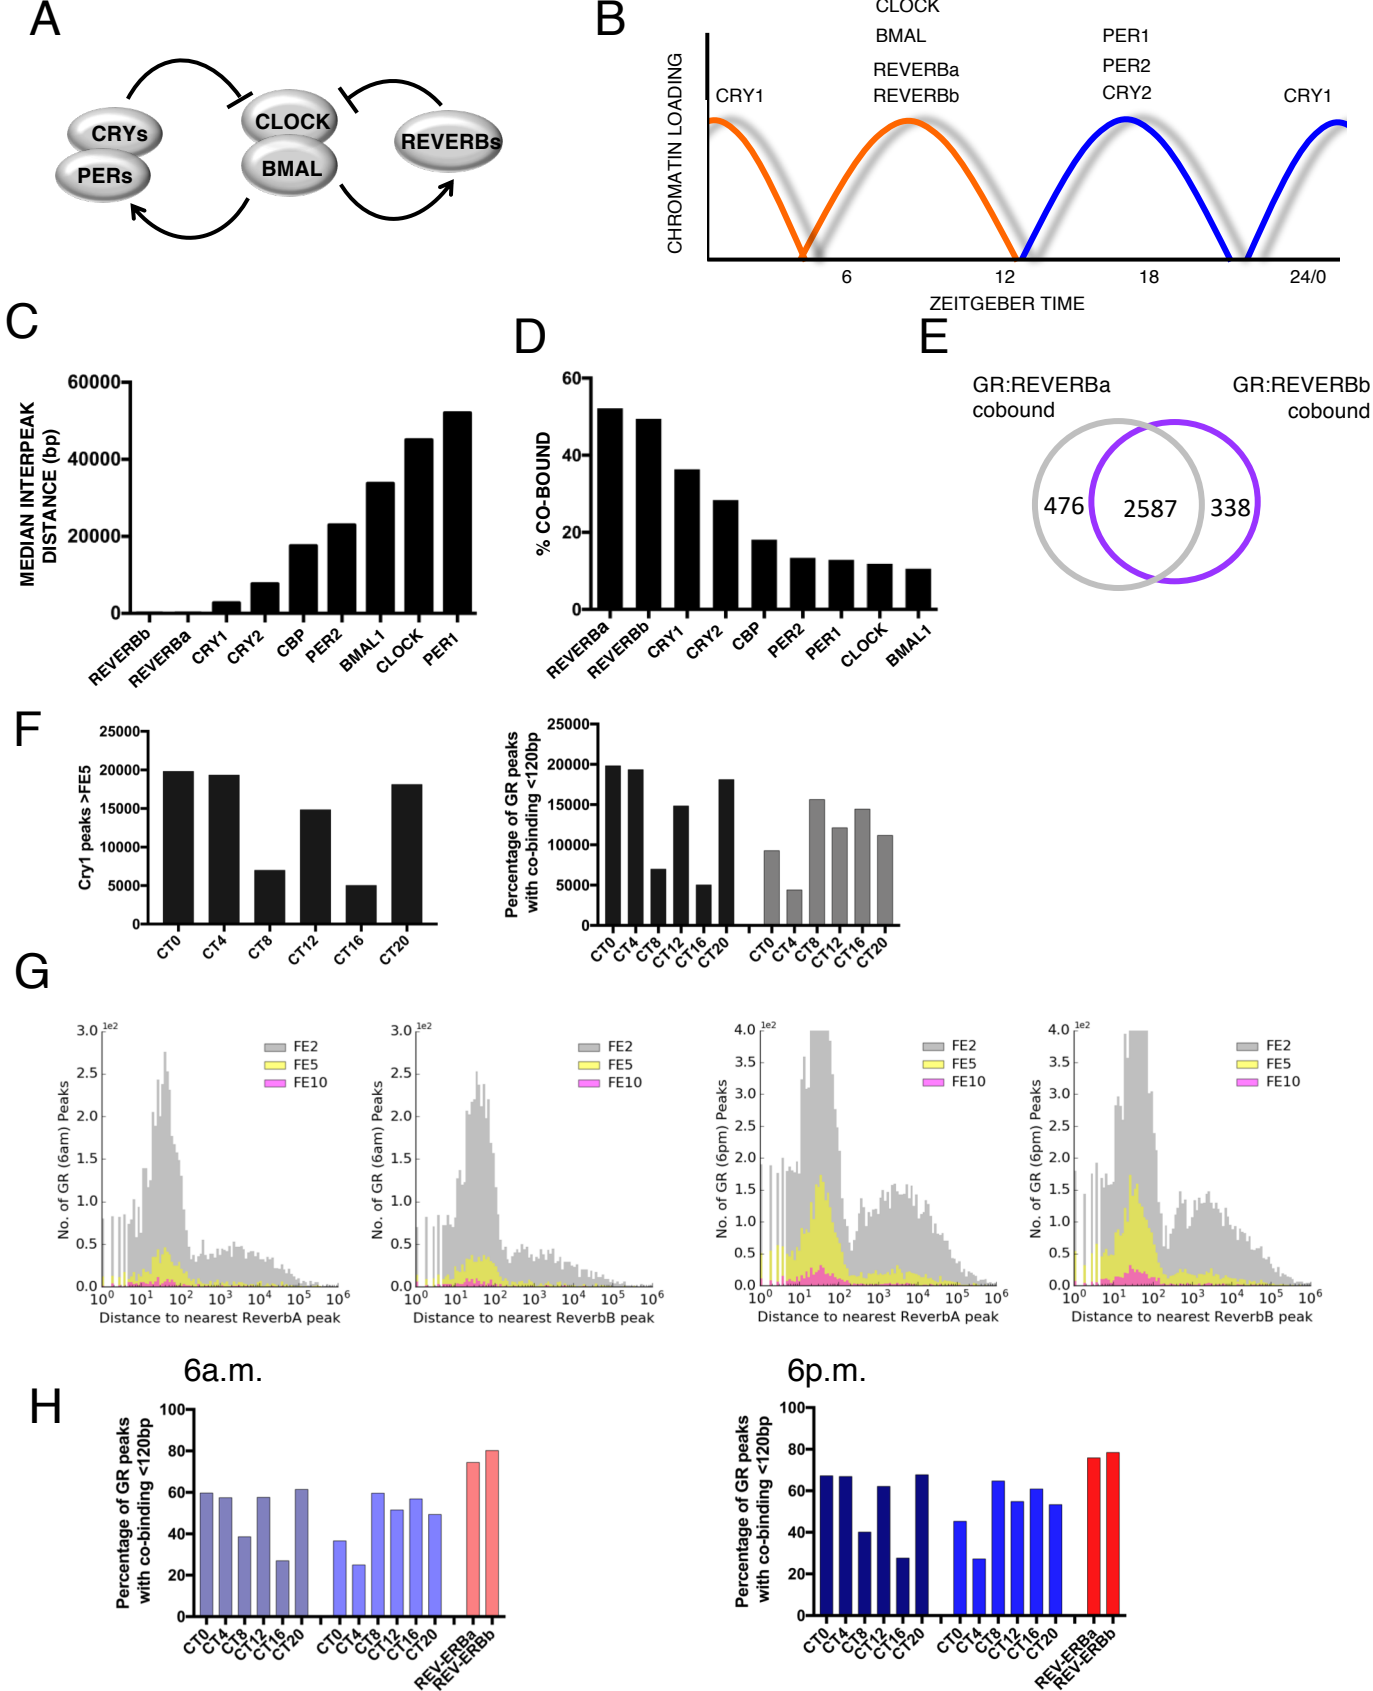

**Figure S4. GR binding shows minimal overlap with binding of some core clock transcription factors.** Cartoon of core clock feedback loop (**A**) and representation of data from Koike et al (**B**). ChIP-seq data for GR and core clock transcription factors was compared to determine proximity of binding. Histograms depict the number of GR binding peaks against distance from closest transcription factor summit using three stringencies (fold enrichment (FE) scores). Median interpeak distances for the highest stringency (FE30) are plotted in order of ranking (**C**). The percentage of GR co-binding with each transcription factor is also plotted (**D**). Genes co-bound by GR and REV-ERBa or REV-ERBb (**E**). Enrichment of CRY1 peaks at 6 time points, and the co-binding percentage of CRY1 or CRY2 with GR cistrome taken from 6 a.m. and 6 p.m. (**F**). REV-ERBa and REV-ERBb co-binding with GR at either 6 a.m. (**G**, left) or 6 p.m. (**G**, right). CRY1 and CRY2 peaks throughout a circadian cycle are shown, and co-binding between GR cistromes at either 6 a.m. (**H**, left) or 6 p.m. (**H**, right) was analysed.

ALL GR BINDING SITES, %RATIO >1.5, TARGET COVERAGE >5%



GRE(NR)[6.99,1e-1696]



CEBP(bZIP)[3.5, 1e-925]



HNF4a(NR)[2.94, 1e-498]



HNF6(Homeobox)[2.94,1e-473]



CEBP:AP1(bZIP)[2.36,1e-388]



Foxa2(Forkhead)[2.24,1e-387]



FOXA1(Forkhead)[2.14,1e-407]



PPARE(NR)[2.11,1e-340]



RXR(NR)[2.1,1e-385]



Esrrb(NR)[2.01,1E-231]



Gata2(Zf)[1.94,1E-152]



Fox:Ebox[1.8,1E-281]



Atf1(bZIP)[1.84,1E-136]



Gata4(Zf)[1.7,1E-147]



Erra(NR)[1.64,1e-419]



Nr5a2(NR)[1.6,1E-123]



NF1-halbsite[1.62,1E-279]



GABPA(ETS)[1.56,1E-108]



GATA3(Zf)[1.5,1E-142]



ETS1(ETS)[1.5,1E-109]



Fli1(ETS)[1.5,1E-109]

**Figure S5. Analysis of all GR binding sites shows enrichment of GREs.** Motif analysis for all GR binding sites. Observed/Expected ratios, and p-values are indicated for each motif.

COMMON GR/REVERB $\alpha$  BINDING SITES, %RATIO >1.5, TARGET COVERAGE >5%

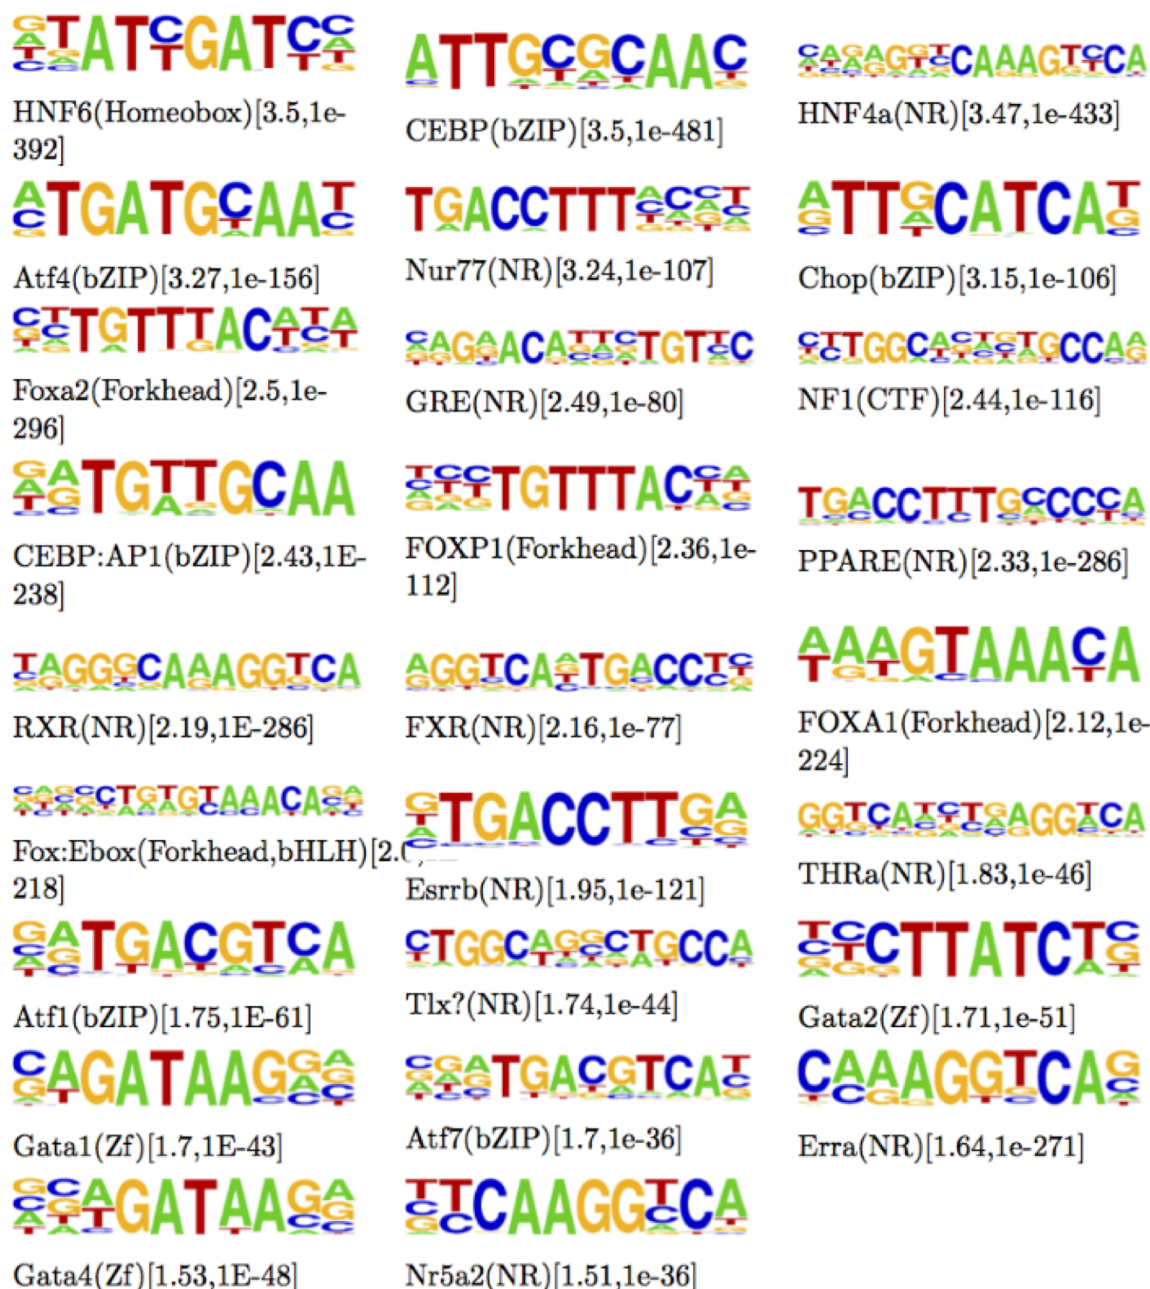

**Figure S6. GR-REV-ERBa co-bound regions are enriched for HNF motifs.** Motif analysis for all GR-REV-ERBa co-bound sites (where binding occurs within 120bp). Observed/Expected ratios, and p-values are indicated for each motif.

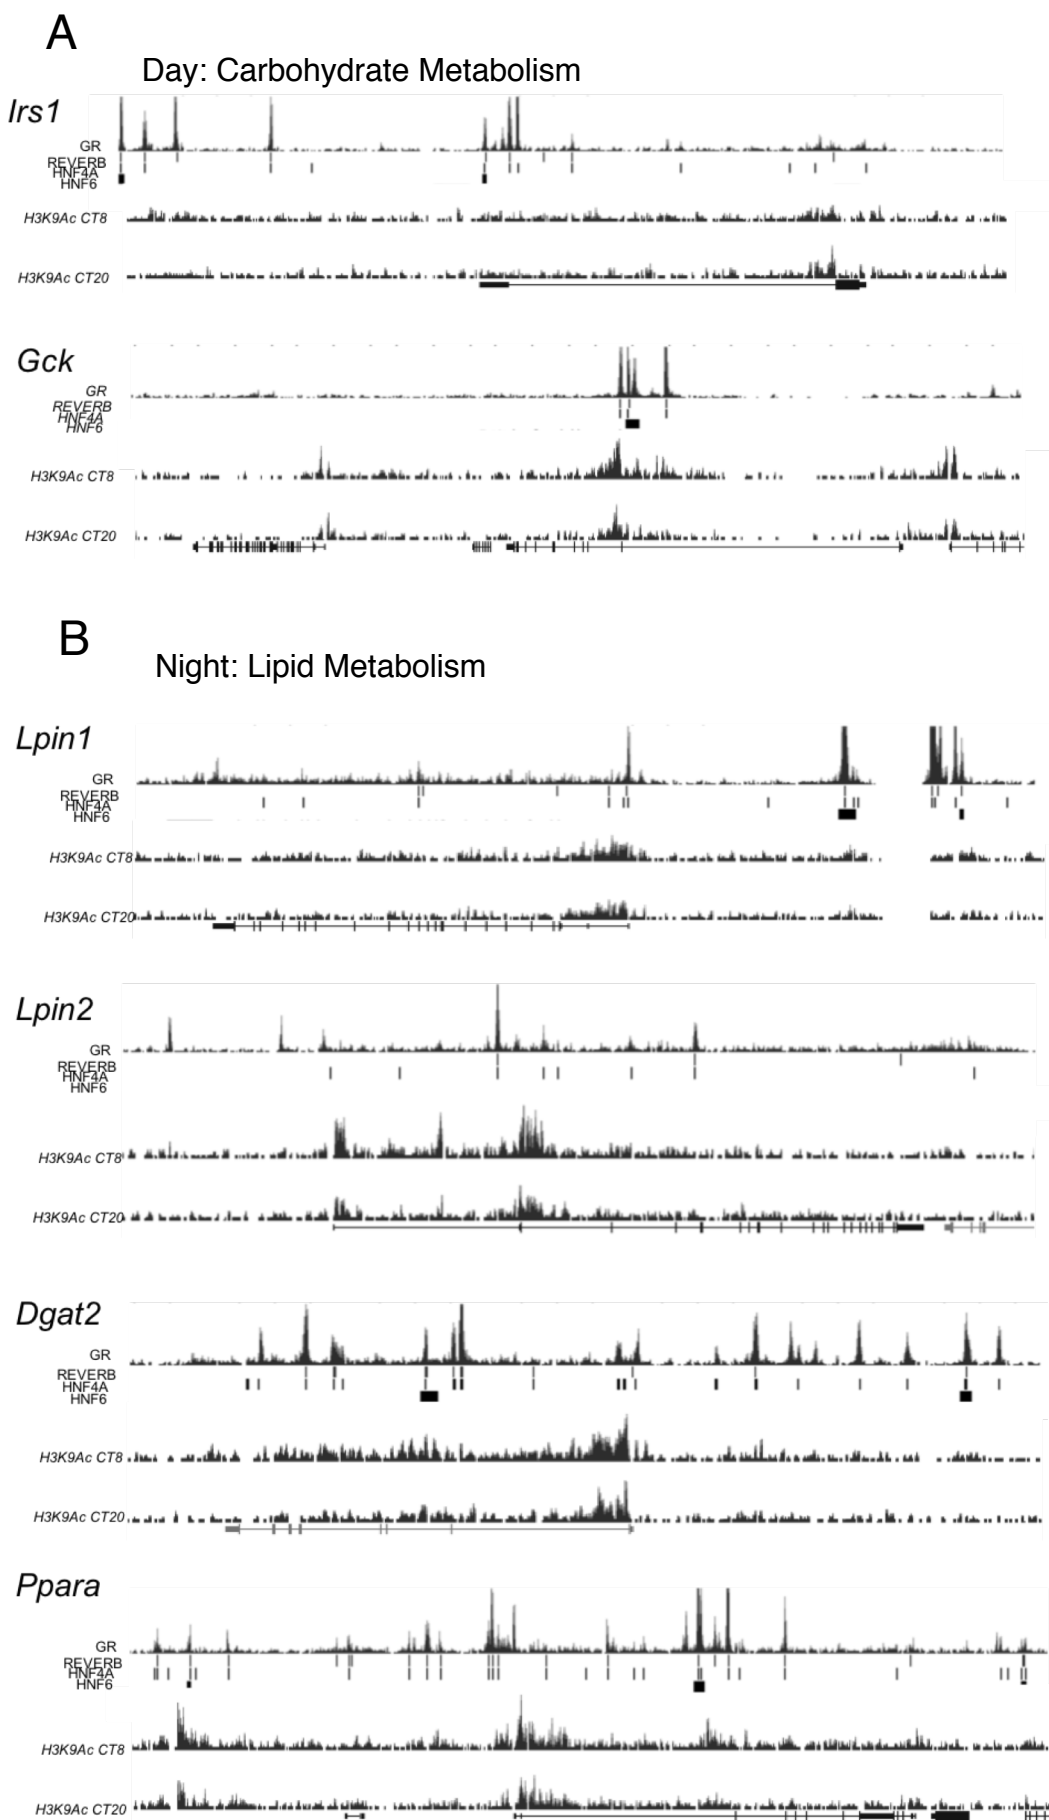

**Figure S7. GR-REV-ERBa co-binding sites coincide with HNF4a binding.** GR, REV-ERBa, HNF4a and HNF6(day and night) genomic locations are overlaid on GR target genes for carbohydrate metabolism (*Gck* and *Irs1*) (A), or target genes for lipid metabolism (*Lpin1*, *Lpin2*, *Dgat2* and *Ppara*) (B).

WT VEH

H&E

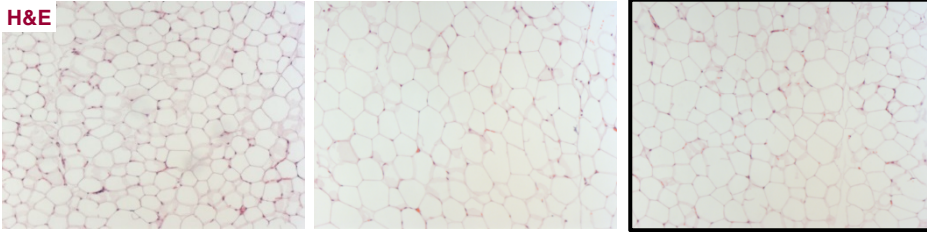

WT DEX

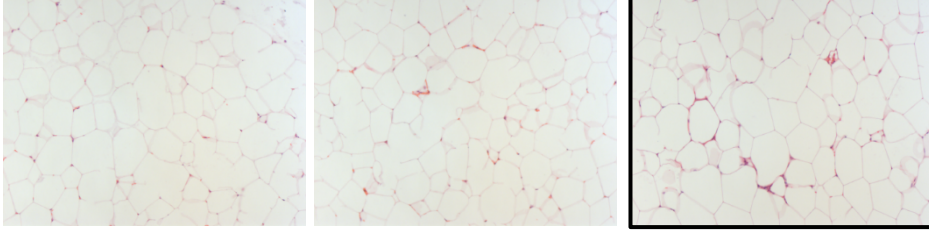

REVERBaKO VEH

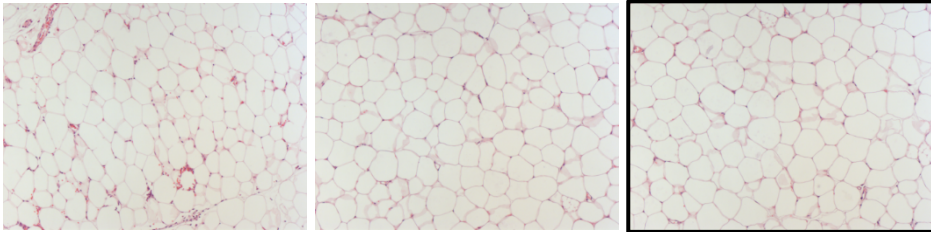

REVERBaKO DEX

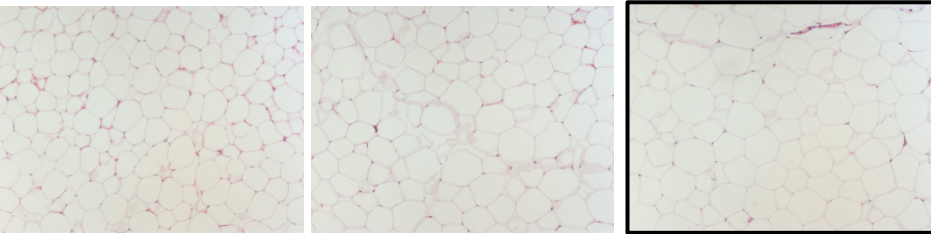

**Figure S8. Dex treatment increases adiposity, adipocyte size and heterogeneity in WT but not REV-ERBaKO mice.** REV-ERBa knockout and littermate controls were treated with dex or vehicle at ZT6 every 48 hours for 8 weeks. Fat mass was tracked every 14 days and relative change in fat mass for each animal plotted. Means across each group are shown in Fig4C (**A**). Visceral adipose was collected at cull and analysed by H&E. Representative images from three animals per group are shown (**B**). Highlighted images are included in Fig4E.



WT VEH

H&E

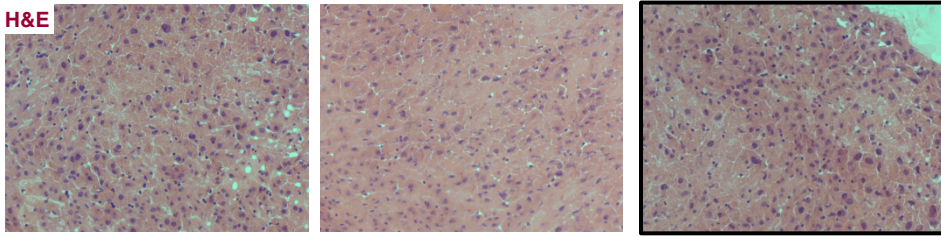

WT DEX

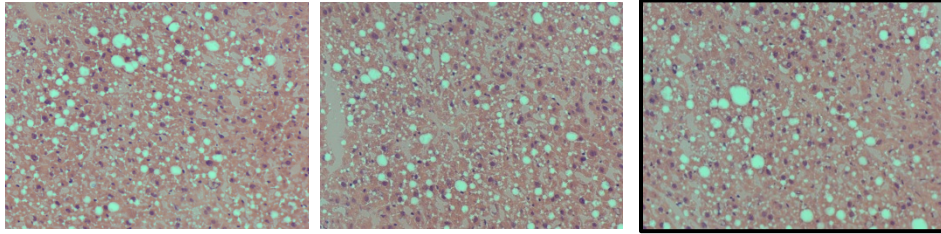

REVERB $\alpha$ KO VEH

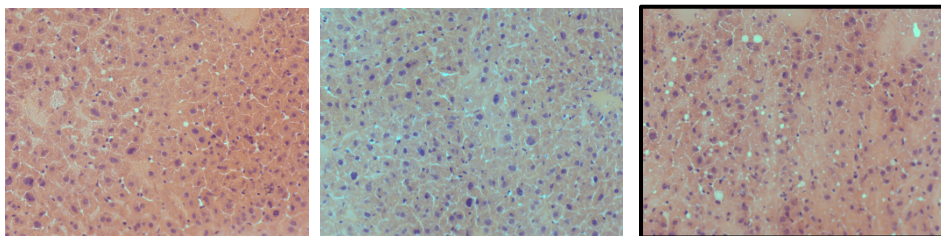

REVERB $\alpha$ KO DEX

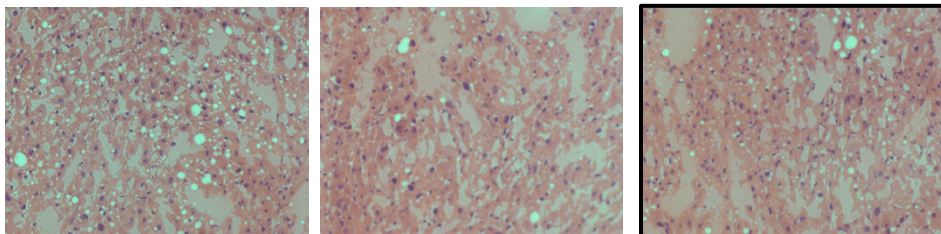

**Figure S9. Loss of REV-ERBa protects from GC induced hepatosteatosis.** REV-ERBa knockout and littermate controls were treated with dex or vehicle at ZT6 every 48 hours for 8 weeks. Liver was collected at cull and analysed by H&E. Representative images from three animals per group are shown. Highlighted images are included in Fig7E.

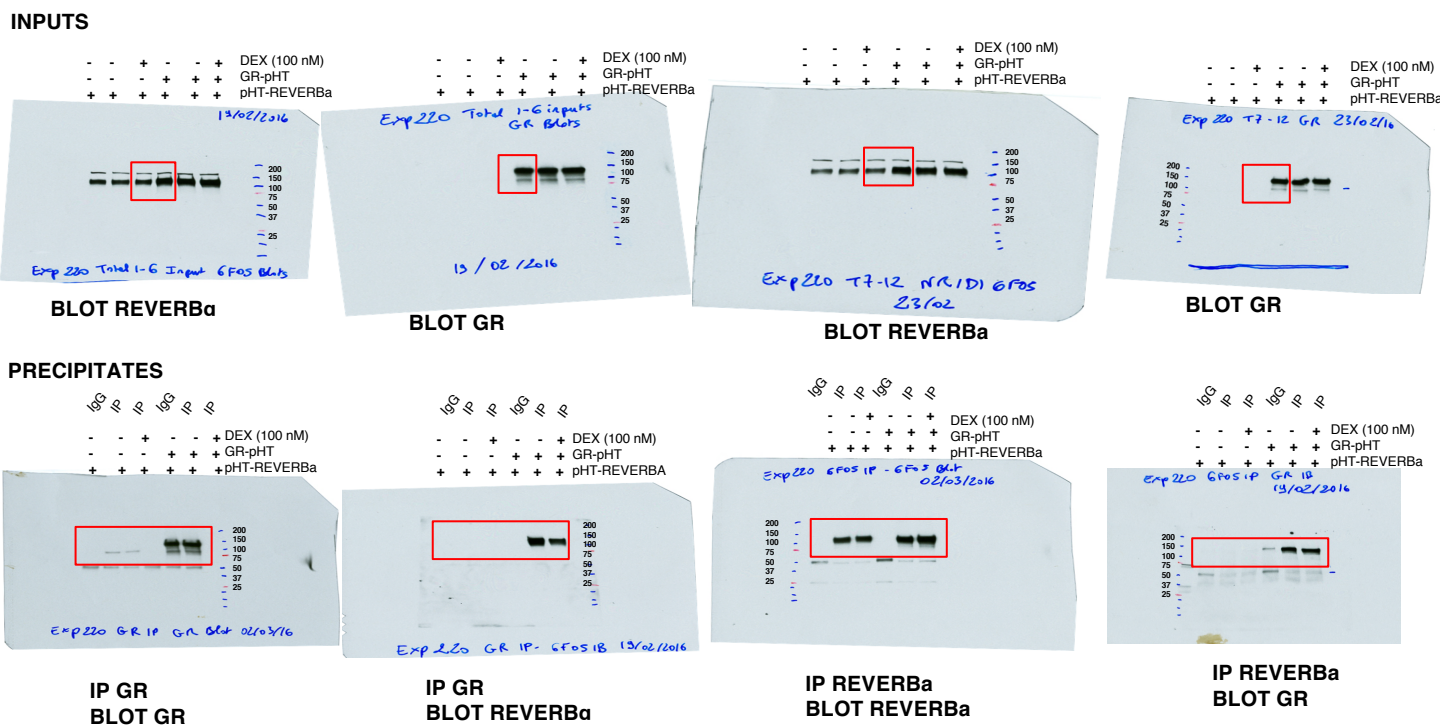

**Figure S10. GR interacts with REV-ERBa in vitro.** Expanded gel images of GR/REVERBa co-immunoprecipitation studies. Full gel scans are shown with cropped images shown in Fig3D highlighted by red boxes. Molecular weight markers are indicated.

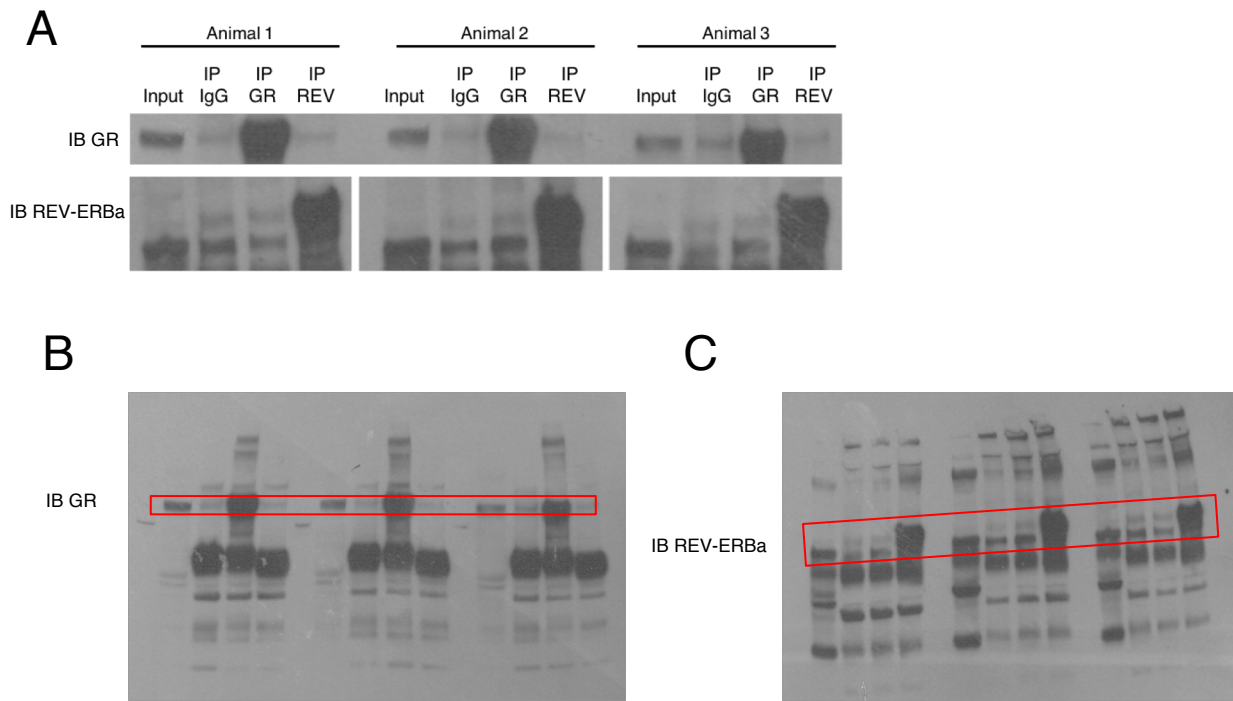

**Figure S11. GR and REV-ERBa interaction is not detected by endogenous co-IP *in vivo*.** GR IP and REV-ERBa IB, or REV-ERBa IP and GR IB were performed on livers of 3 different animals independently (**A**). Whole blots are shown (**B, C**), red boxes indicate area chosen for A.

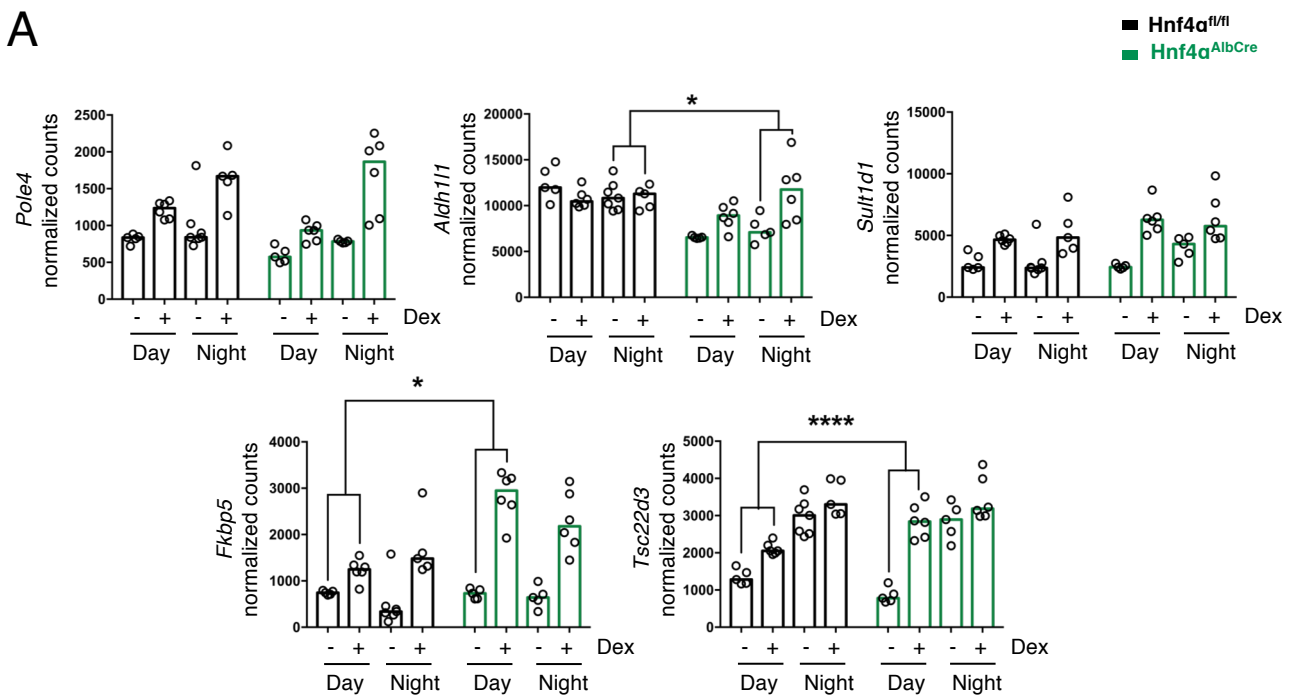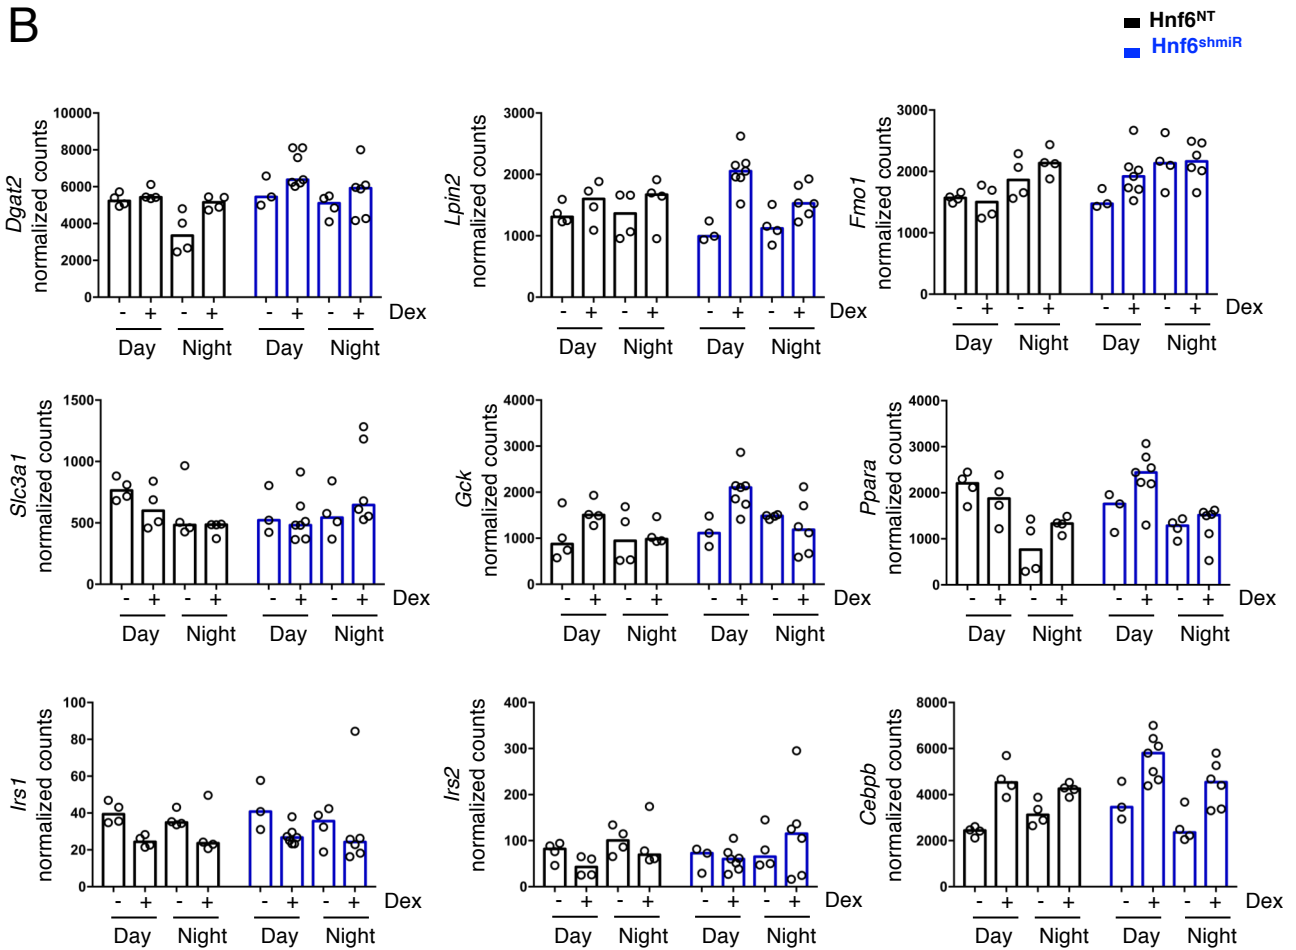

**Figure S12. HNF4 $\alpha$  and HNF6 control GR time of day gene regulation.** *HNF4a<sup>AlbCre</sup>* and *HNF4a<sup>fl/fl</sup>* controls (N=5-7)(A) or C57BL/6J mice were injected with shRNA against *HNF6*, or non-targeting shRNA (N=3-7) (B). Mice were treated with 1mg/kg dex at ZT6 or ZT18 and culled 2 hours later. Livers were harvested, and RNA analysed via NanoString. Statistical analysis via LIMMA, q < 0.05\*, q < 0.0001\*\*\*\* data shown as individual mice and median.

**A**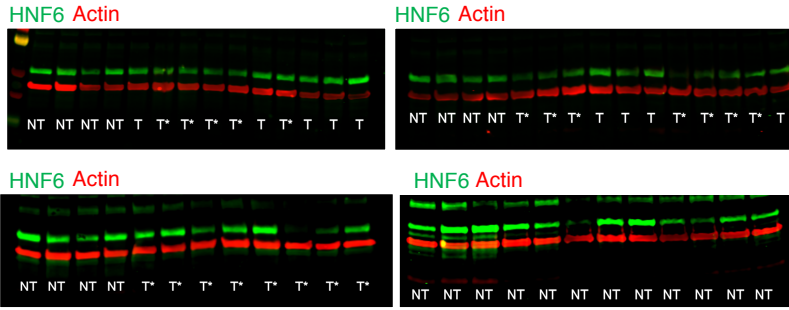

NT: Non-targeting shRNA

T: Targetting shRNA

T\*: Targetting shRNA used in further experimentation

**B**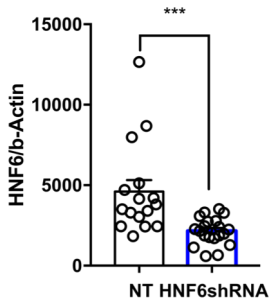

**Figure S13. HNF6 knockdown.** Whole blots of HNF6 (green) and b-actin (red). NT = non-targeting shRNA, T = targeting. Mice that received targeting shRNA and used in studies are marked with T\* (**A**). Knockdown of HNF6 was quantified via comparing HNF6 signal to b-Actin signal (N=16-20) (**B**). Statistical analysis by two-tailed Student's T-test,  $p < 0.001^{***}$  data shown as mean  $\pm$ SEM.

**Table S1. KEGG PATHWAY ANALYSIS OF DAY GC TARGETS IN LUNG**

| PathwayName                                               | #Gene              | Statistics                                             |
|-----------------------------------------------------------|--------------------|--------------------------------------------------------|
| <a href="#">Cytokine-cytokine receptor interaction</a>    | <a href="#">25</a> | C=245;O=25;E=2.27;R=11.02;rawP=1.25e-18;adjP=1.54e-16  |
| <a href="#">B cell receptor signaling pathway</a>         | <a href="#">14</a> | C=76;O=14;E=0.70;R=19.89;rawP=1.18e-14;adjP=7.26e-13   |
| <a href="#">Hematopoietic cell lineage</a>                | <a href="#">13</a> | C=82;O=13;E=0.76;R=17.11;rawP=7.98e-13;adjP=3.27e-11   |
| <a href="#">Metabolic pathways</a>                        | <a href="#">40</a> | C=1184;O=40;E=10.97;R=3.65;rawP=3.63e-12;adjP=1.12e-10 |
| <a href="#">Natural killer cell mediated cytotoxicity</a> | <a href="#">13</a> | C=125;O=13;E=1.16;R=11.23;rawP=1.91e-10;adjP=4.70e-09  |
| <a href="#">Chemokine signaling pathway</a>               | <a href="#">14</a> | C=185;O=14;E=1.71;R=8.17;rawP=2.60e-09;adjP=4.00e-08   |
| <a href="#">Complement and coagulation cascades</a>       | <a href="#">10</a> | C=76;O=10;E=0.70;R=14.20;rawP=2.36e-09;adjP=4.00e-08   |
| <a href="#">Pathways in cancer</a>                        | <a href="#">18</a> | C=325;O=18;E=3.01;R=5.98;rawP=2.20e-09;adjP=4.00e-08   |
| <a href="#">Leishmaniasis</a>                             | <a href="#">9</a>  | C=64;O=9;E=0.59;R=15.18;rawP=8.23e-09;adjP=1.12e-07    |
| <a href="#">Malaria</a>                                   | <a href="#">8</a>  | C=46;O=8;E=0.43;R=18.77;rawP=9.86e-09;adjP=1.21e-07    |
| <a href="#">Cell adhesion molecules (CAMs)</a>            | <a href="#">11</a> | C=149;O=11;E=1.38;R=7.97;rawP=1.70e-07;adjP=1.75e-06   |
| <a href="#">Osteoclast differentiation</a>                | <a href="#">10</a> | C=118;O=10;E=1.09;R=9.15;rawP=1.71e-07;adjP=1.75e-06   |
| <a href="#">MAPK signaling pathway</a>                    | <a href="#">14</a> | C=268;O=14;E=2.48;R=5.64;rawP=2.72e-07;adjP=2.57e-06   |
| <a href="#">Neuroactive ligand-receptor interaction</a>   | <a href="#">14</a> | C=277;O=14;E=2.57;R=5.46;rawP=4.05e-07;adjP=3.32e-06   |
| <a href="#">Staphylococcus aureus infection</a>           | <a href="#">7</a>  | C=50;O=7;E=0.46;R=15.11;rawP=3.98e-07;adjP=3.32e-06    |
| <a href="#">T cell receptor signaling pathway</a>         | <a href="#">9</a>  | C=110;O=9;E=1.02;R=8.83;rawP=9.53e-07;adjP=7.21e-06    |
| <a href="#">NOD-like receptor signaling pathway</a>       | <a href="#">7</a>  | C=57;O=7;E=0.53;R=13.26;rawP=9.97e-07;adjP=7.21e-06    |
| <a href="#">Jak-STAT signaling pathway</a>                | <a href="#">10</a> | C=153;O=10;E=1.42;R=7.06;rawP=1.88e-06;adjP=1.28e-05   |
| <a href="#">Toxoplasmosis</a>                             | <a href="#">9</a>  | C=127;O=9;E=1.18;R=7.65;rawP=3.17e-06;adjP=2.05e-05    |
| <a href="#">p53 signaling pathway</a>                     | <a href="#">7</a>  | C=70;O=7;E=0.65;R=10.79;rawP=4.08e-06;adjP=2.51e-05    |

**Table S2. KEGG PATHWAY ANALYSIS OF NIGHT GC TARGETS IN LUNG**

| PathwayName                                               | #Gene              | Statistics                                            |
|-----------------------------------------------------------|--------------------|-------------------------------------------------------|
| <a href="#">Cytokine-cytokine receptor interaction</a>    | <a href="#">27</a> | C=245;O=27;E=2.14;R=12.60;rawP=1.54e-21;adjP=1.60e-19 |
| <a href="#">Hematopoietic cell lineage</a>                | <a href="#">16</a> | C=82;O=16;E=0.72;R=22.31;rawP=2.27e-17;adjP=1.18e-15  |
| <a href="#">Primary immunodeficiency</a>                  | <a href="#">11</a> | C=34;O=11;E=0.30;R=37.00;rawP=4.90e-15;adjP=1.70e-13  |
| <a href="#">Natural killer cell mediated cytotoxicity</a> | <a href="#">16</a> | C=125;O=16;E=1.09;R=14.64;rawP=2.40e-14;adjP=6.24e-13 |
| <a href="#">T cell receptor signaling pathway</a>         | <a href="#">15</a> | C=110;O=15;E=0.96;R=15.59;rawP=5.99e-14;adjP=1.25e-12 |
| <a href="#">B cell receptor signaling pathway</a>         | <a href="#">12</a> | C=76;O=12;E=0.66;R=18.06;rawP=3.28e-12;adjP=5.69e-11  |
| <a href="#">Chemokine signaling pathway</a>               | <a href="#">16</a> | C=185;O=16;E=1.62;R=9.89;rawP=1.10e-11;adjP=1.63e-10  |
| <a href="#">Osteoclast differentiation</a>                | <a href="#">13</a> | C=118;O=13;E=1.03;R=12.60;rawP=4.54e-11;adjP=5.25e-10 |
| <a href="#">Graft-versus-host disease</a>                 | <a href="#">10</a> | C=54;O=10;E=0.47;R=21.18;rawP=4.06e-11;adjP=5.25e-10  |
| <a href="#">Chagas disease (American trypanosomiasis)</a> | <a href="#">12</a> | C=100;O=12;E=0.87;R=13.72;rawP=9.20e-11;adjP=9.57e-10 |
| <a href="#">Leishmaniasis</a>                             | <a href="#">10</a> | C=64;O=10;E=0.56;R=17.87;rawP=2.38e-10;adjP=2.25e-09  |
| <a href="#">Type I diabetes mellitus</a>                  | <a href="#">9</a>  | C=59;O=9;E=0.52;R=17.44;rawP=2.38e-09;adjP=2.06e-08   |
| <a href="#">MAPK signaling pathway</a>                    | <a href="#">15</a> | C=268;O=15;E=2.34;R=6.40;rawP=1.96e-08;adjP=1.57e-07  |
| <a href="#">Toll-like receptor signaling pathway</a>      | <a href="#">10</a> | C=101;O=10;E=0.88;R=11.32;rawP=2.26e-08;adjP=1.68e-07 |
| <a href="#">Cell adhesion molecules (CAMs)</a>            | <a href="#">11</a> | C=149;O=11;E=1.30;R=8.44;rawP=9.58e-08;adjP=6.64e-07  |
| <a href="#">p53 signaling pathway</a>                     | <a href="#">8</a>  | C=70;O=8;E=0.61;R=13.07;rawP=1.90e-07;adjP=1.23e-06   |
| <a href="#">Toxoplasmosis</a>                             | <a href="#">10</a> | C=127;O=10;E=1.11;R=9.00;rawP=2.01e-07;adjP=1.23e-06  |
| <a href="#">African trypanosomiasis</a>                   | <a href="#">6</a>  | C=32;O=6;E=0.28;R=21.44;rawP=3.24e-07;adjP=1.87e-06   |
| <a href="#">Rheumatoid arthritis</a>                      | <a href="#">8</a>  | C=81;O=8;E=0.71;R=11.29;rawP=5.95e-07;adjP=3.26e-06   |
| <a href="#">Apoptosis</a>                                 | <a href="#">8</a>  | C=86;O=8;E=0.75;R=10.64;rawP=9.45e-07;adjP=4.91e-06   |

**Table S3. KEGG PATHWAY ANALYSIS OF DAY GC TARGETS IN LIVER**

| PathwayName                                         | #Gene              | Statistics                                             |
|-----------------------------------------------------|--------------------|--------------------------------------------------------|
| <a href="#">Endocytosis</a>                         | <a href="#">37</a> | C=220;O=37;E=6.17;R=6.00;rawP=2.43e-18;adjP=2.88e-16   |
| <a href="#">Metabolic pathways</a>                  | <a href="#">92</a> | C=1184;O=92;E=33.21;R=2.77;rawP=3.05e-18;adjP=2.88e-16 |
| <a href="#">Pathways in cancer</a>                  | <a href="#">40</a> | C=325;O=40;E=9.12;R=4.39;rawP=6.90e-15;adjP=4.35e-13   |
| <a href="#">Ribosome</a>                            | <a href="#">24</a> | C=119;O=24;E=3.34;R=7.19;rawP=3.23e-14;adjP=1.53e-12   |
| <a href="#">MAPK signaling pathway</a>              | <a href="#">35</a> | C=268;O=35;E=7.52;R=4.66;rawP=5.59e-14;adjP=2.11e-12   |
| <a href="#">Focal adhesion</a>                      | <a href="#">27</a> | C=200;O=27;E=5.61;R=4.81;rawP=1.87e-11;adjP=5.89e-10   |
| <a href="#">Vascular smooth muscle contraction</a>  | <a href="#">19</a> | C=123;O=19;E=3.45;R=5.51;rawP=1.78e-09;adjP=4.81e-08   |
| <a href="#">Leishmaniasis</a>                       | <a href="#">14</a> | C=64;O=14;E=1.80;R=7.80;rawP=2.28e-09;adjP=5.39e-08    |
| <a href="#">Regulation of actin cytoskeleton</a>    | <a href="#">25</a> | C=216;O=25;E=6.06;R=4.13;rawP=2.73e-09;adjP=5.73e-08   |
| <a href="#">Axon guidance</a>                       | <a href="#">19</a> | C=131;O=19;E=3.67;R=5.17;rawP=5.24e-09;adjP=9.90e-08   |
| <a href="#">Chemokine signaling pathway</a>         | <a href="#">22</a> | C=185;O=22;E=5.19;R=4.24;rawP=1.46e-08;adjP=2.51e-07   |
| <a href="#">Adipocytokine signaling pathway</a>     | <a href="#">13</a> | C=68;O=13;E=1.91;R=6.82;rawP=4.74e-08;adjP=7.47e-07    |
| <a href="#">Wnt signaling pathway</a>               | <a href="#">19</a> | C=154;O=19;E=4.32;R=4.40;rawP=7.62e-08;adjP=1.11e-06   |
| <a href="#">Toxoplasmosis</a>                       | <a href="#">17</a> | C=127;O=17;E=3.56;R=4.77;rawP=1.10e-07;adjP=1.48e-06   |
| <a href="#">Amoebiasis</a>                          | <a href="#">16</a> | C=116;O=16;E=3.25;R=4.92;rawP=1.70e-07;adjP=2.14e-06   |
| <a href="#">Osteoclast differentiation</a>          | <a href="#">16</a> | C=118;O=16;E=3.31;R=4.83;rawP=2.16e-07;adjP=2.55e-06   |
| <a href="#">Insulin signaling pathway</a>           | <a href="#">17</a> | C=137;O=17;E=3.84;R=4.42;rawP=3.35e-07;adjP=3.72e-06   |
| <a href="#">Starch and sucrose metabolism</a>       | <a href="#">10</a> | C=45;O=10;E=1.26;R=7.92;rawP=3.82e-07;adjP=4.01e-06    |
| <a href="#">NOD-like receptor signaling pathway</a> | <a href="#">11</a> | C=57;O=11;E=1.60;R=6.88;rawP=4.61e-07;adjP=4.59e-06    |
| <a href="#">Bile secretion</a>                      | <a href="#">12</a> | C=71;O=12;E=1.99;R=6.03;rawP=6.32e-07;adjP=5.69e-06    |



**Table S4. KEGG PATHWAY ANALYSIS OF NIGHT GC TARGETS IN LIVER**

| PathwayName                                                 | #Gene             | Statistics                                        |
|-------------------------------------------------------------|-------------------|---------------------------------------------------|
| <a href="#">Cysteine and methionine metabolism</a>          | <a href="#">3</a> | C=39;O=3;E=0.05;R=56.34;rawP=2.16e-05;adjP=0.0001 |
| <a href="#">Metabolic pathways</a>                          | <a href="#">8</a> | C=1184;O=8;E=1.62;R=4.95;rawP=0.0002;adjP=0.0005  |
| <a href="#">Protein processing in endoplasmic reticulum</a> | <a href="#">3</a> | C=169;O=3;E=0.23;R=13.00;rawP=0.0016;adjP=0.0027  |
| <a href="#">Steroid hormone biosynthesis</a>                | <a href="#">2</a> | C=55;O=2;E=0.08;R=26.63;rawP=0.0026;adjP=0.0032   |

**Table S5 REVERB $\alpha$  DEPENDENT GC TARGETS: LIPID METABOLISM**

| GENE   | DAY        | NIGHT |
|--------|------------|-------|
| INSIG1 | WT ↓       | KO ↓  |
| SCARB1 | -          | KO ↑  |
| CPT1A  | -          | KO ↑  |
| DGAT2  | -          | KO ↑  |
| G6PC   | -          | WT ↓  |
| HNF4A  | -          | KO ↑  |
| SESN2  | -          | KO ↑  |
| MIA2   | -          | KO ↑  |
| ACSL1  | KO ↑       | KO ↑  |
| CYP2E1 | -          | KO ↑  |
| LPIN1  | WT ↑, KO ↑ | KO ↑  |
| LPIN2  | KO ↑       | KO ↑  |

**Table S6 REVERB $\alpha$  DEPENDENT GC TARGETS: CARBOHYDRATE METABOLISM**

| GENE    | DAY  | NIGHT |
|---------|------|-------|
| IRS1    | WT ↓ | WT ↓  |
| PPP13RG | WT ↓ | -     |
| SMEK1   | WT ↑ | -     |
| PPP1R3B | WT ↑ | -     |
| IRS2    | WT ↓ | -     |
| SORBS1  | WT ↓ | -     |
| PDK4    | WT ↑ | -     |
| NR1D1   | WT ↓ | -     |
| GCK     | WT ↑ | -     |
| FOXO1   | KO ↑ | KO ↑  |
| ACER2   | WT ↑ | -     |
| PGC1A   | KO ↑ | KO ↑  |

**Table S7 Primer Sequences**

| <b>GENE</b>      | <b>PRIMERS</b>                |
|------------------|-------------------------------|
| $\beta$ -Actin   | F-AGGTCATCACTATTGGCAACGA      |
|                  | R-CACTTCATGATGGAATTGAATGTAGTT |
| EFNA1            | F-GTGGAGAAGCCTGTGGGAAC        |
|                  | R-GTGTGTATCGCTCCATGGCT        |
| Wt1              | F-CACGGCACAGGGTATGAGAG        |
|                  | R-GTTGGGGCCACTCCAGATAC        |
| Aldh1b1          | F-AGCCTCTGTTCAAGTTCAAG        |
|                  | R-CCTTAAAGCCTCCGAATGG         |
| DIO1             | F-GTGGTGGACACAATGCAGAAC       |
|                  | R-ACGATTGGGTCTATAAGTGGC       |
| GAPDH (Genomic)  | F-CAAGAAACAGGGGAGCTGAG        |
|                  | R-TTGGTTGTACATCCAAGCA         |
| Mt ND1 (Genomic) | F-GGATCCGAGCATCTTATCCA        |
|                  | R-GGTGGTACTCCCGCTGTAAA        |
| IL-6             | F-GCTACCAAAGTGGATATAATCAGGA   |
|                  | R-CCAGGTAGCTATGGTACTCCAGAA    |
| DUSP1            | F-GTGCCTGACAGTGCAGAATC        |
|                  | R-CACTGCCAGGTACAGGAAG         |
| TAT (ChIP)       | F-CGCAAACAACAGGAAGCCTAA       |
|                  | R-CATGACACCCAAAAGCCTCTC       |
| Lpin1 (ChIP)     | F-TTCTTCCCCTGATGTGCCTG        |
|                  | R-GCAGGATGTGGGAGTGCTAA        |

**Table S8 Nanostring Codeset – Circadian Control Genes**

| Gene ID   | Gene name | Genotype x Treatment (FDR<0.05) |
|-----------|-----------|---------------------------------|
| NM_007771 | Cry1      |                                 |
| NM_011066 | Per2      |                                 |
| NM_145434 | Nr1d1     |                                 |
| NM_011584 | Nr1d2     |                                 |
| NM_007715 | Clock     |                                 |
| NM_007489 | Arntl     |                                 |

**Table S9 Nanostring Codeset – Nuclear Receptor Control Genes**

| Gene ID      | Gene name | Genotype x Treatment (FDR<0.05) |
|--------------|-----------|---------------------------------|
| NM_008173    | Nr3c1     |                                 |
| NM_009327    | Hnf1a     |                                 |
| NM_008261    | Hnf4a     | HNF4 ZT6                        |
| NM_008262    | Onecut1   |                                 |
| NM_194268    | Onecut2   |                                 |
| NM_001291065 | Foxa2     |                                 |
| NM_009883    | Cebpb     | HNF4 ZT6                        |
| NM_009473    | Nr1h2     |                                 |

**Table S10 Nanostring Codeset – Gc Responsive Genes**

| Gene ID      | Gene name | Genotype x Treatment (FDR<0.05) |
|--------------|-----------|---------------------------------|
| NM_001077364 | Tsc22d3   | HNF4 ZT6                        |
| NM_010220    | Fkbp5     | HNF4 ZT6                        |
| NM_029083    | Ddit4     |                                 |
| NM_010107    | Efna1     | HNF4 ZT18                       |
| NM_144783    | Wt1       |                                 |
| NM_028270    | Aldh1b1   |                                 |
| NM_001190466 | Dact1     |                                 |
| NM_008904    | Ppargc1a  |                                 |
| NM_133249    | Ppargc1b  |                                 |
| NM_028696    | Nabp1     |                                 |
| NM_007824    | Cyp7a1    |                                 |
| NM_016771    | Sult1d1   | HNF6 ZT6                        |

**Table S11 Nanostring Codeset – Loading Controls**

| Gene ID   | Gene name | Genotype x Treatment (FDR<0.05) |
|-----------|-----------|---------------------------------|
| NM_009735 | B2m       |                                 |
| NM_007393 | Actb      |                                 |
| NM_007907 | Eef2      |                                 |

**Table S12 Nanostring Codeset – REVERBa-GR Co-binding Genes**

| Gene ID      | Gene name | Genotype x Treatment<br>(FDR<0.05) |
|--------------|-----------|------------------------------------|
| NM_011400    | Slc2a1    |                                    |
| NM_172659    | Slc2a6    |                                    |
| NM_153526    | Insig1    |                                    |
| NM_026384    | Dgat2     | HNF4 ZT6                           |
| NM_001291835 | Alas1     |                                    |
| NM_007408    | Plin2     |                                    |
| NM_020568    | Plin4     |                                    |
| NM_011144    | Ppara     | HNF4 ZT6                           |
| NM_011146    | Pparg     |                                    |
| NM_010570    | Irs1      |                                    |
| NM_001081212 | Irs2      |                                    |
| NM_010292    | Gck       | HNF4 ZT18                          |
| NM_001130412 | Lpin1     | HNF4 ZT6                           |
| NM_001164885 | Lpin2     | HNF4 ZT6                           |
| NM_009205    | Slc3a1    | HNF4 ZT18                          |
| NM_010231    | Fmo1      | HNF4 ZT6                           |
| NM_025882    | Pole4     | HNF6 ZT6                           |
| NM_001356412 | Aldh1l1   | HNF4 both times, HNF6<br>ZT6       |
| NM_026534    | Ubxn2b    |                                    |
